# Supplementary material
Source: MDPI journal article supplement (https://www.mdpi.com/search?q=microorganisms-08-01667)
Supplement: s001 [file microorganisms-08-01667-s001.pdf]

**Table S1** Gene Bank Accession Number and origin/habitat description of the reference strains used for phylogenetic tree construction

| Gene Bank Nr. | Taxon                                         | Strain                | Origin/Habitat                                                                                                                           |
|---------------|-----------------------------------------------|-----------------------|------------------------------------------------------------------------------------------------------------------------------------------|
| MK211230      | <i>"Pseudophormidium"</i><br><i>battersii</i> | KZ-16-2               | Ukraine: the Crimea, Leninsky Distinct, Kazantip national reserve, chasmoendoliths, limestone outcrops, coast of Azov Sea, coast of Azov |
| AJ626846      | <i>"Urospora"</i> sp. uncultured              |                       | Antarctica: Terra Nova Bay, sea water                                                                                                    |
| U63099        | <i>Bracteacoccus giganteus</i>                | UTEX 1251             | USA                                                                                                                                      |
| KF673367      | <i>Bracteacoccus minor</i>                    | SAG 221-1             | soil                                                                                                                                     |
| JQ281841      | <i>Bracteacoccus ruber</i>                    | CCAP 221/7            | Antarctica: Mt Erebus, Ross Island, soil                                                                                                 |
| MK231272      | <i>Bracteacoccus xerophilus</i>               | KZ-2-2-6              | Ukraine: the Crimea, Leninsky Distinct, Kazantip national reserve, biocrust, clay scree, coast of Azov                                   |
| FR865616      | <i>Chlamydomonas applanata</i>                | CCAP 11/9             | Czech Republic: botanic garden, Prague University, decaying leaf litter                                                                  |
| FR865582      | <i>Chlamydomonas dorsoventralis</i>           | CCAP 11/4             | Czech Republic: Hirschberg, pond, Dorfteich                                                                                              |
| JQ315503      | <i>Chlamydomonas hedleyi</i>                  | KMMCC 188             | seawater                                                                                                                                 |
| FR865590      | <i>Chlamydomonas leicostraca</i>              | CCAP 11/49            | UK: Cambridge, England, Madingley Road, farmyard puddle                                                                                  |
| AB511834      | <i>Chlamydomonas reinhardtii</i>              | UTEX 90               | USA: Amherst, Massachusetts, potato field                                                                                                |
| JQ315516      | <i>Chlamydomonas</i> sp.                      | KMMCC 189             | seawater                                                                                                                                 |
| GQ176853      | <i>Chlorella pituita</i>                      | ACOI 311              | Portugal: Mira, trout nursery                                                                                                            |
| MH415449      | <i>Chloroidium lichenum</i>                   | Vancurova<br>OP1118.1 | Czech Republic: lichen thallus, slag, on <i>Stereocaulon nanodes</i>                                                                     |
| FR865528      | <i>Chloromonas rosae</i>                      | CCAP 11/112           | Norway: østfold, Lake Hollitjernet (freshwater)                                                                                          |
| MH703736      | <i>Chloromonas</i> sp.                        | Ru-6-8                | Germany: Prora, Rügen, biocrust, sand dunes, Baltic Sea coast                                                                            |
| AY476827      | <i>Chlorothrix</i> sp.                        | ChloPac47SI           | Canada: Ucluelet, Vancouver I., British Columbia                                                                                         |
| KM020111      | <i>Coccobotrys mucosus</i>                    | SAG 24.92             | Antarctica: Princess Elizabeth Land, Vestfold Hills, nutrient enriched soil, elephant seal wallow                                        |
| KM020110      | <i>Coccobotrys verrucariae</i>                | SAG 16.97             | Switzerland: phycobiont of lichen <i>Verrucaria</i> spec.                                                                                |
| FM882216      | <i>Desmochloris halophila</i>                 | CCAP 6006/1           | Africa                                                                                                                                   |
| FM882217      | <i>Desmochloris mollenhaueri</i>              | CCAP 6006/2           | South Africa: Flaminkvlakte, western Succulent Karoo, semi-desert, biocrust                                                              |
| LT560371      | <i>Edaphochlorella mirabilis</i>              | SAG 211-30            | Germany: Göttingen, Old Botanical Garden University of Göttingen, basin                                                                  |
| FJ648518      | <i>Elliptochloris subsphaerica</i>            | SAG 2202              | Japan: Yokogawa, Hiroshima-City, on surface of bark                                                                                      |

|                 |                                              |                 |                                                                                                  |
|-----------------|----------------------------------------------|-----------------|--------------------------------------------------------------------------------------------------|
| <b>MH703757</b> | <i>Emerochloris sphaerica</i>                | Us-s-7-5        | Germany: Karlshagen, Usedom, biocrust, Baltic Sea coast                                          |
| <b>FR865661</b> | <i>Graesiella emersonii</i>                  | CCAP 211/5      | UK: England, freshwater                                                                          |
| <b>AM412750</b> | <i>Koliella sempervirens</i>                 | CCALA 363       | Slovakia: Bratislava                                                                             |
| <b>HE984579</b> | <i>Leptochlorella corticola</i>              | I2e             | Slovenia: Portoroz, bark of <i>Cupressus sempervirens</i>                                        |
| <b>KF693810</b> | <i>Leptochlorella</i> sp.                    | UTEX EE84       | Israel: Negev Desert                                                                             |
| <b>FR798945</b> | <i>Leptolyngbya foveolarum</i>               | VP1-08          | Italy: Firenze, Villa La Pietra, concrete-made fountain with stagnant water, gray dry crust      |
| <b>KP081398</b> | <i>Myrmecia cf. irregularis</i>              | LH08AW3064      | Germany: terrestrial                                                                             |
| <b>JQ922411</b> | <i>Nannochloris</i> sp.                      | AICB 424        |                                                                                                  |
| <b>MH305359</b> | <i>Nannochloris</i> sp.                      | Z5              | Russia: Siberia, saline lake Shira                                                               |
| <b>HM018677</b> | <i>Nodosilinea epilithica</i>                | Kovacik 1998/7* | Italy: Vieste, Foggia, Peninsula Gargano, green biofilm on the wall of house                     |
| <b>KJ004406</b> | <i>Phormidesmis</i> sp.                      | ACL_P2D9        | USA: Oroville, Washington, microbial mat in hypersaline hot lake                                 |
| <b>MF034636</b> | <i>Planophila bipyrenoidosa</i>              | ULVO-1          | alpine chalk soils?                                                                              |
| <b>AY493583</b> | <i>Plectolyngbya hodgsonii</i>               | ANT.LPR2.2      | Antarctica: Long peninsula, saline Pendant lake                                                  |
| <b>X91268</b>   | <i>Pseudomuriella aurantica</i>              | SAG 249-1       | Switzerland: Basel, Ritterstrasse 31, wet shaded tuff in garden                                  |
| <b>AB360750</b> | <i>Rusalka fusiformis</i>                    | NIES-123        | Japan: Niseko, Hokkaido, Lake Shinsen-numa (freshwater)                                          |
| <b>KM020016</b> | <i>Tetracystis</i> sp.                       | 14601-7.1       |                                                                                                  |
| <b>MH703773</b> | <i>Tetrademus arenicola</i>                  | WD-7-1          | Germany: Warnemuende, sand dunes, Baltic Sea coast, biocrust                                     |
| <b>MG022741</b> | <i>Tetrademus obliquus</i>                   | CCAP 276/3C     | Germany: Marburg, freshwater                                                                     |
| <b>DQ821515</b> | <i>Ulothrix</i> sp.                          | X1              | USA: west shore of Amaknak Island, Alaska, mid intertidal boulders near the Dutch Harbor airport |
| <b>DQ821516</b> | <i>Ulothrix</i> sp.                          | X3              | USA: west shore of Amaknak Island, Alaska, mid intertidal boulders near the Dutch Harbor airport |
| <b>FN811228</b> | uncultured cyanobacterium                    | UMAB-cl-44      | Antarctica: Alexander Island, soil                                                               |
| <b>AY476821</b> | <i>Urospora neglecta</i>                     | strain Seward 8 | Canada: Seward, Alaska                                                                           |
| <b>AJ626846</b> | <i>Urospora</i> sp.                          | uncultured      | Antarctica: Terra Nova Bay, the Italian Antarctic Station, thick green mats on granitic rocks    |
| <b>MH827565</b> | <i>Watanabea acidotolerans</i>               | CAUP H 8901     | Czech Republic: stone surface, found at the bottom near shore of acidic (pH 2.6) Hromnice Lake   |
| <b>MH499911</b> | <i>Watanabea borysthena</i>                  | SAG 2550        | Ukraine: Trakhtemyriv Nature Reserve, on surface of sandstone                                    |
| <b>KC463197</b> | " <i>Leptolyngbya</i> " <i>subtilissima</i>  | EcFYyyy700      | South Africa: Succulent Karoo, semi-desert, biocrust                                             |
| <b>JX513885</b> | " <i>Scotiellopsis</i> " <i>reticulata</i>   | CCALA 474 2     | Romania: Constanta, sand, psammon                                                                |
| <b>KY807917</b> | „ <i>Chlorogloea</i> “ <i>microcystoides</i> | SABCo22904      | Ireland: Kilkee                                                                                  |
| <b>AY455943</b> | <i>Acrosiphonia coalita</i>                  |                 | USA: California, Humboldt County, Baker Beach                                                    |
| <b>HE610119</b> | <i>Acrosiphonia</i> sp.                      | SAG 127.80      | Germany: Helgoland, marine                                                                       |

|           |                                                   |                     |                                                                                           |
|-----------|---------------------------------------------------|---------------------|-------------------------------------------------------------------------------------------|
| FN562430  | <i>Acrosiphonia</i> sp.                           | SAG 127.80          | Germany: Helgoland, marine                                                                |
| AB049418  | <i>Acrosiphonia duriuscula</i> var. <i>tenuis</i> |                     |                                                                                           |
| MH703777  | <i>Actinochloris sphaerica</i>                    | SAG 23.93           | Germany: Brandenburg, Güterfelde/Potsdam, loamy sandy soil from winter barley field       |
| AB936278  | <i>Actinochloris sphaerica</i>                    | UTEX 121            |                                                                                           |
| AY510463  | <i>Acutodesmus deserticola</i>                    | BCP-YPGChar         | USA: Yuma Proving Ground, Arizona                                                         |
| MK503792  | <i>Aliinostoc catenatum</i>                       | SA24                | Iran: Mazandaran province of Iran, garden soil                                            |
| MK503793  | <i>Aliinostoc constrictum</i>                     | SA30                | Iran: Mazandaran province of Iran, paddy field                                            |
| NR_158066 | <i>Aliinostoc morphoplasticum</i>                 | MCC3177             | India: Sihora, Jabalpur, eutrophic pond                                                   |
| AB058336  | <i>Alvikia littorale</i>                          | MBIC10280           |                                                                                           |
| JX169829  | <i>Apatococcus lobatus</i>                        | SAG 2151            | Germany: Rostock, Südstadt, Max-Planck-Str., on plastic switchbox                         |
| JX169826  | <i>Apatococcus lobatus</i>                        | SAG 2359            | Germany: Göttingen, Obere Karspüle 18, on green plastic biowaste bin                      |
| KM020133  | <i>Axilosphaera vegetata</i>                      | SAG 30.95           | USA: TN, Wilson Country, surface soil from cedar glades of Lebanon State Forest           |
| AJ000206  | <i>Blidingia minima</i>                           |                     | UK: Scotland                                                                              |
| AY303596  | <i>Bolbocoleon piliferum</i>                      | Waz1                | USA: Cattle Point, San Juan Island, Washington, endophytic in <i>Cymathere triplicata</i> |
| MF101222  | <i>Borodinellopsis texensis</i>                   | JM002               | Thailand: sea salt farm                                                                   |
| KM020129  | <i>Borodinellopsis texensis</i>                   | SAG 17.95           | USA: Texas, soil from Mustang Islan                                                       |
| JQ281839  | <i>Bracteacoccus aerius</i>                       | UTEX 1250           | USA: Austin, Texas, air-borne dust                                                        |
| JQ281840  | <i>Bracteacoccus aggregatus</i>                   | G2-3                | Germany: Göttingen, meadow                                                                |
| MH703740  | <i>Bracteacoccus aggregatus</i>                   | Ru-s-4-5            | Germany: Prora, Ruegen, biocrust, sand dunes, Baltic sea coast                            |
| MH703758  | <i>Bracteacoccus aggregatus</i>                   | Us-s-7-3            | Germany: Zempin, Usedom, biocrust, baltic sea coast                                       |
| JF717415  | <i>Bracteacoccus bohemiensis</i>                  | KF-2011b            | Czech Republic                                                                            |
| JQ281848  | <i>Bracteacoccus bullatus</i>                     | SAG 2032            | Germany: near Harz mountains, soil from mining dump, contaminated with heavy metals       |
| JQ259931  | <i>Bracteacoccus bullatus</i>                     | SAG 2317            |                                                                                           |
| JQ281857  | <i>Bracteacoccus deserticola</i>                  | BCP-EM3-VF7         | USA: Sierra San Pedro Martir of Baja California, Mexico, decomposed granite sandy soil    |
| HQ246427  | <i>Bracteacoccus giganteus</i>                    | UTEX 1252           | USA: Enchanted Rock, Texas                                                                |
| JQ281862  | <i>Bracteacoccus glacilis</i>                     | Broady 686          | Antarctica                                                                                |
| JF717398  | <i>Bracteacoccus minor</i>                        | UTEX 66             |                                                                                           |
| JQ259951  | <i>Bracteacoccus occidentalis</i>                 | BCP-WJT8-VFNP<br>19 | USA: Joshua Tree National Park, California                                                |
| JQ281867  | <i>Bracteacoccus polaris</i>                      | KF28                | Sweden: Abisko                                                                            |

---

|                  |                                    |               |                                                                                                                             |
|------------------|------------------------------------|---------------|-----------------------------------------------------------------------------------------------------------------------------|
| <b>HQ246424</b>  | <i>Bracteacoccus pseudominor</i>   | UTEX 1247     |                                                                                                                             |
| <b>AF516676</b>  | <i>Bracteacoccus</i> sp.           | BC2-1         | USA: desert soil                                                                                                            |
| <b>JQ281873</b>  | <i>Bracteacoccus xerophilus</i>    | BCP-ZNP1-VF32 | USA: Utah, Zion National Park                                                                                               |
| <b>EF490447</b>  | <i>Brasilonema terrestre</i>       | CNA116        |                                                                                                                             |
| <b>NR_114995</b> | <i>Calothrix desertica</i>         | PCC 7102      | Chile: Antofagasta, sand                                                                                                    |
| <b>HF678479</b>  | <i>Calothrix parietina</i>         | CCAP 1410/10  | UK: England, Durham, freshwater stream                                                                                      |
| <b>KU951670</b>  | cf. <i>Phormidesmis</i> sp.        | LEGE 11434    | Portugal: less than 1 km off the shore, near Leixoes Harbour, subtidal                                                      |
| <b>MF034630</b>  | <i>Chamaetrichon brasiliensis</i>  | SAG 1.87      | USA: TE, Nashville, pool at Couchville Pike                                                                                 |
| <b>MF034631</b>  | <i>Chamaetrichon brasiliensis</i>  | SAG 2396      | Germany: western margin of the Franconian Alb, tufa-forming karstwater stream "Deinschwanger Bach", biofilm on rock surface |
| <b>JN385292</b>  | <i>Champylonemopsis</i> sp.        | HA4241-MV5    | USA: Oahu, Hawaii, Laie Falls                                                                                               |
| <b>LC322160</b>  | <i>Chlamydomonas bilatus</i>       | SAG 7.72      | Slovakia: High Tatra Mountains, pool (freshwater)                                                                           |
| <b>FR865606</b>  | <i>Chlamydomonas hydra</i>         | CCAP 11/6B    | freshwater                                                                                                                  |
| <b>JN903986</b>  | <i>Chlamydomonas macrostellata</i> | SAG 72.81     | France: Jardin Alpin du Museum, Paris, freshwater ditch                                                                     |
| <b>AB058373</b>  | <i>Chlamydomonas parkeae</i>       | MBIC10599     |                                                                                                                             |
| <b>AJ781313</b>  | <i>Chlamydomonas raudensis</i>     | CCAP 11/131   | Antarctica: Lake Bonney                                                                                                     |
| <b>GU117583</b>  | <i>Chlamydomonas reticulata</i>    | CCCryo 154-01 | Norway: Svalbard, High Arctic, snow, from the surface of the Svenbreen glacier                                              |
| <b>KP313859</b>  | <i>Chlamydomonas</i> sp.           | UWO 241       | Antarctica: Lake Bonney                                                                                                     |
| <b>HQ111432</b>  | <i>Chlorella chlorelloides</i>     | CB 2008/110   | Germany: Mecklenburg Vorpommern, plankton in lake Pragsdorfer See (freshwater)                                              |
| <b>FM205862</b>  | <i>Chlorella coloniales</i>        | UTEX 938      |                                                                                                                             |
| <b>FM205858</b>  | <i>Chlorella elongata</i>          | CCAP 211/18   |                                                                                                                             |
| <b>FM205861</b>  | <i>Chlorella lewinii</i>           | CCAP 211/90   | Chile: Easter Island, soil from the edge of a permanent freshwater pond in a crater                                         |
| <b>FM946019</b>  | <i>Chlorella lichenum</i>          | SAG 2115      | Germany: Göttingen, Nikolausberger Weg 18, on silicone insolation                                                           |
| <b>FM205833</b>  | <i>Chlorella lobophora</i>         | SAG 37.88     | former USSR; Briamskaia district, Krasmyj Rog, soil from mixed forest                                                       |
| <b>FM205856</b>  | <i>Chlorella pituita</i>           | ACOI 856      | Portugal: Serra da Estrela, Manteigas, flowing water                                                                        |
| <b>HQ111431</b>  | <i>Chlorella pulchelloides</i>     | CCAP 211/118  | Germany: Feldberger Haussee (freshwater)                                                                                    |
| <b>HQ111433</b>  | <i>Chlorella rotunda</i>           | CCAP 260/11   | Angola: Okavango, freshwater                                                                                                |
| <b>KM020042</b>  | <i>Chlorella salina</i>            | SAG 8.86      | UK: North Wales, oyster breeding tank at Conway                                                                             |
| <b>HQ111435</b>  | <i>Chlorella singularis</i>        | CCAP 211/119  | Kenya: Nakuru Sewage Pond, freshwater                                                                                       |
| <b>FM205834</b>  | <i>Chlorella sorokiniana</i>       | SAG 211.8k    |                                                                                                                             |

---

|                 |                                   |               |                                                                                                                   |
|-----------------|-----------------------------------|---------------|-------------------------------------------------------------------------------------------------------------------|
| <b>Y14950</b>   | <i>Chlorella</i> sp.              | Yanaqocha RA1 | Peru: Lake Yanaqocha?                                                                                             |
| <b>HQ111434</b> | <i>Chlorella volutis</i>          | CCAP 211/120  | Kenya: Nakuru National Park, Rhinopool, freshwater                                                                |
| <b>FN298917</b> | <i>Chlorella vulgaris</i>         | CCAP 211/109  | USA: endosymbiont of <i>Paramecium bursaria</i> , freshwater                                                      |
| <b>FR865659</b> | <i>Chlorella vulgaris</i>         | CCAP 211/11Q  | former Czechoslovakia: freshwater                                                                                 |
| <b>AY591508</b> | <i>Chlorella vulgaris</i>         | SAG 211-11b   | Netherlands: eutrophic pond near Delft                                                                            |
| <b>MH703759</b> | <i>Chlorella vulgaris</i>         | Us-s-7-4      | Germany: Zempin, Usedom, biocrust, Baltic Sea coast                                                               |
| <b>AB058302</b> | <i>Chlorococcum dorsiventrale</i> | MBIC10044     |                                                                                                                   |
| <b>FR865693</b> | <i>Chlorocystis</i> sp.           | CCAP 233/1    | France: Soulac, from <i>Ulva</i> culture                                                                          |
| <b>MK541803</b> | <i>Chlorocystis</i> sp.           | CCAP 6005/13  | Madagascar: Chenal d'Ampanarata , Belo sur Mer, epiphyte on <i>Bostrychia pinnata</i> (marine)                    |
| <b>AB278611</b> | <i>Chlorogonium capillatum</i>    | NIES-692      | Japan: Miyatoko Mire Fukushima Japan, freshwater bog                                                              |
| <b>AB278621</b> | <i>Chlorogonium elongatum</i>     | NIES-751      | UK: England, Caldbeck., freshwater pond                                                                           |
| <b>AB278607</b> | <i>Chlorogonium euchlorum</i>     | UTEX 2010     | Germany                                                                                                           |
| <b>KR607488</b> | <i>Chlorogonium</i> sp.           | SAG 17        |                                                                                                                   |
| <b>MH551519</b> | <i>Chloroidium antarcticum</i>    | ISBAL-103     | Antarctica: South Shetlands, King George Island, Ecology Glacier                                                  |
| <b>MH551521</b> | <i>Chloroidium arboriculum</i>    | MG-3          | Vienna: Vienna Forest, bark of tree, free-living biofilm on <i>Fagus sylvatica</i>                                |
| <b>FM946012</b> | <i>Chloroidium ellipsoideum</i>   | SAG 3.95      |                                                                                                                   |
| <b>FM946015</b> | <i>Chloroidium ellipsoideum</i>   | SAG 2143      | Germany: Rostock, Südstadt, Ernst-Häckel-Str.12-15, east, on rough plaster                                        |
| <b>FM946011</b> | <i>Chloroidium engadinense</i>    | SAG 812-1     | Switzerland: Unterengadin, soil                                                                                   |
| <b>HF586465</b> | <i>Chloroidium laureanum</i>      | CAUP H8501    | Slovenia: Ankaran, corticolous microbial biofilms, bark of <i>Laurus nobilis</i>                                  |
| <b>FM946020</b> | <i>Chloroidium lichenum</i>       | SAG 2144      | Germany: Rostock, Südstadt, Brahestr. 7-11, west, on rough plaster                                                |
| <b>MH551523</b> | <i>Chloroidium lobatum</i>        | CAUP 8502     | Slovenia: Pacug, bark of <i>Fraxinus ornus</i>                                                                    |
| <b>FM946000</b> | <i>Chloroidium saccharophilum</i> | SAG 211-9a    | Germany: sap from wounded <i>Populus alba</i>                                                                     |
| <b>MH703747</b> | <i>Chloroidium</i> sp.            | Ru-6-6        | Germany: Prora, Ruegen, biocrust, sand dunes, Baltic Sea coast                                                    |
| <b>FR865615</b> | <i>Chloroidium</i> sp.            | CCAP 11/8     | former Czechoslovakia: freshwater                                                                                 |
| <b>MH415214</b> | <i>Chloroidium</i> sp.            | LV-2018       | Czech Republic: Dobany, lichen thallus ( <i>Stereocaulon vesuvianum</i> ), on industrial foam                     |
| <b>MH551495</b> | <i>Chloroidium viscosum</i>       | SAG 56.87     | Austria: Burgenland near Tatzmannsdorf, trunk of <i>Quercus</i> , phycobiont of lichen <i>Woessia fusarioides</i> |
| <b>AJ410445</b> | <i>Chloromonas actinochloris</i>  | SAG 1.72      | USA: Texas, Caldwell Co., soil                                                                                    |
| <b>MG189707</b> | <i>Chloromonas arctica</i>        | CCALA:10278   | Norway: Svalbard, High Arctic, snow, from the surface of the Svenbreen glacier                                    |
| <b>AJ410452</b> | <i>Chloromonas aufgustae</i>      | SAG 5.73      | former Czechoslovakia: mucous covers in swamp, freshwater                                                         |
| <b>AY653740</b> | <i>Chlorothrix</i> sp.            | C167          | Canada: Ucluelet, Vancouver, British Columbia                                                                     |

|                 |                                          |                 |                                                                                                        |
|-----------------|------------------------------------------|-----------------|--------------------------------------------------------------------------------------------------------|
| <b>MK211229</b> | <i>Chroakolemma edaphica</i>             | KZ-23-2         | Ukraine: the Crimea, Leninsky Distinct, Kazantip national reserve, biocrust, clay scree, coast of Azov |
| <b>GU827477</b> | <i>Chromochloris zofingiensis</i>        | CAUP H6503      | Sweden: Lake Erken                                                                                     |
| <b>KF673375</b> | <i>Chropmochloris zofingiensis</i>       | SAG 221-2       | Switzerland: Unterengadin, soil                                                                        |
| <b>HG972998</b> | <i>Coccomyxa dispar</i>                  | SAG 49.84       | Germany: peat soil in Steinhauser Ried, phycobiont of lichen <i>Multiclavula vernalis</i>              |
| <b>HG973006</b> | <i>Coccomyxa viridis</i>                 | SAG 2325        | France: Tours, from protoplast cell cultures of a <i>Ginkgo biloba</i> tree from botanical garden      |
| <b>JX513883</b> | <i>Coelastrella</i> sp.                  | SAG 2123        | Germany: Schermbeck, Haus Dr. Ammenwerth, Burgstrasse, edge of the woods, rooftile                     |
| <b>AF388376</b> | <i>Coelastrum sphaericum</i>             | SAG 32.81       | Hungary: freshwater                                                                                    |
| <b>JX169834</b> | <i>Coenochloris signiensis</i>           | CCAP 176/3      | Antarctica: Signy Island, South Orkney Islands, Antarctica, soil and moss                              |
| <b>NR125521</b> | <i>Coleofasciculus chthonoplastes</i>    | strain SAG 2209 | Germany: Zingst, Baltic Sea, wind flat, microbial mat                                                  |
| <b>MF034603</b> | <i>Ctenocladus circinnatus</i>           | CCMP 2158       | sandstone                                                                                              |
| <b>MF034606</b> | <i>Ctenocladus circinnatus</i>           | ULVO-18         | sandstone                                                                                              |
| <b>KJ737428</b> | <i>Cyanocohniella calida</i>             | CCALA 1049      | Czech Republic: Karlovy Vary, hot thermal spring                                                       |
| <b>MN243143</b> | <i>Cyanocohniella crotaloides</i>        | PJ S45          | Netherlands: Schirmonnikoog Island, cyanobacterial mats                                                |
| <b>MT425938</b> | <i>Cyanocohniella</i> sp.                | ACSSI 322       | Russia: soil                                                                                           |
| <b>FR774768</b> | <i>Cyanopsira rippkae</i>                | NMBCI           | Chad: Eastern fringe of Lake Chad, closed hyperalkaline pond                                           |
| <b>AY038036</b> | <i>Cyanospira rippkae</i>                | PCC 9501        | Kenya: hypersaline soda lake Magadi                                                                    |
| <b>KF144190</b> | <i>Desmochloris</i> cf. <i>halophila</i> | SAG 2397        | Germany: Franconian Alb, Deinschwanger Creek, biofilm on rock surface in karstwater stream             |
| <b>AB049416</b> | <i>Desmochloris halophila</i>            | UTEX 2073       | brakish water                                                                                          |
| <b>MH703754</b> | <i>Desmochloris halophila</i>            | Ru-s-3-2        | Germany: Rügen, Glowe, biocrust, sand dunes, Baltic Sea coast                                          |
| <b>FM882218</b> | <i>Desmochloris mollenhaueri</i>         | CCAP 6006/3     | South Africa: Flaminkvlakte, western Succulent Karoo biome, semi-desert, biocrust                      |
| <b>KY086483</b> | <i>Desmochloris</i> sp.                  | ACSSI 180       | Russia: Oblast Volgograd                                                                               |
| <b>KF791549</b> | <i>Desmochloris</i> sp.                  | JB13            | China: Songnen Plain, saline-alkali soil, grassland                                                    |
| <b>AJ431571</b> | <i>Desmococcus endolithicus</i>          | SAG 15.92       | Antarctica: Edward VII Peninsula, Marie Bird Land, chasmoendolithic at Scott Nunataks                  |
| <b>KM020049</b> | <i>Desmococcus olivaceus</i>             | SAG 1.92        | Austria: Vienna, bark                                                                                  |
| <b>KP726266</b> | <i>Desmodesmus denticulatus</i>          | KLL-G003 clone  | Israel                                                                                                 |
| <b>AM711523</b> | <i>Desmonostoc mucosum</i>               | Lukesova 1/87   | Czech Republic :Plzensky kraj, Dlouha Ves, soil sample from wet meadow                                 |
| <b>HG004585</b> | <i>Desmonostoc</i> sp.                   | PCC 9230        | Canada: Park 1, Halifax, Nova Scotia                                                                   |
| <b>KM020081</b> | <i>Dictyochloris fragrans</i>            | SAG 220-1b      | Switzerland: soil from National Park Unterengadin at II Fuorn                                          |
| <b>GU017656</b> | <i>Dictyochloropsis splendida</i>        | HEW11-R2        | Germany: bark of beech tree                                                                            |

|                 |                                       |               |                                                                                                                                          |
|-----------------|---------------------------------------|---------------|------------------------------------------------------------------------------------------------------------------------------------------|
| <b>GU017649</b> | <i>Dictyochloropsis splendida</i>     | SAG 2071      | Japan: Nishi-kawaguchi-cho, Hiroshima-Pref., on surface of bark                                                                          |
| <b>FM205840</b> | <i>Didymogenes palatina</i>           | SAG 30.92     | Germany: Jülich, fire fighters pond at KFA                                                                                               |
| <b>MF124975</b> | <i>Diplosphaera chodatii</i>          | D52           | Canada: Manitoba, Payuk Lake                                                                                                             |
| <b>MK201746</b> | <i>Diplosphaera chodatii</i>          | KZ-26-5       | Ukraine: the Crimea, Leninsky Distinct, Kazantip national reserve, chasmoendoliths, limestone outcrops, coast of Azov Sea, coast of Azov |
| <b>MT078177</b> | <i>Diplosphaera chodatii</i>          | SAG 11.88     | New Zealand: Waweira Scenic Reserve, phycobiont of lichen <i>Pseudocyphellaria carpoloma</i> on <i>Rhopalostylus sapida</i>              |
| <b>MT078178</b> | <i>Diplosphaera chodatii</i>          | SAG 48.86     | Antarctica: Princess Elizabeth Land, Vestfold Hills, from moss                                                                           |
| <b>HQ129931</b> | <i>Diplosphaera chodatii</i>          | UTEX 1177     | USA: Texas, Blackland Prairie, soil                                                                                                      |
| <b>KM020116</b> | <i>Diplosphaera chodatii</i>          | SAG 49.86     | Switzerland: Basel, Botanical Garden University Basel, water bloom small bog                                                             |
| <b>MH703748</b> | <i>Diplosphaera</i> sp.               | Ru-6-16       | Germany: Prora, Ruegen, biocrust, sand dunes, Baltic Sea coast                                                                           |
| <b>DQ009763</b> | <i>Dunaliella parva</i>               | SAG 19-1      | Romania: Lacul Sarat, marine                                                                                                             |
| <b>DQ530055</b> | <i>Elliptochloris bilobata</i>        | SAG 245.80    | Austria: Kärnten, Kreuzeckgruppe, 2200 m, phycobiont of <i>Catolechia wahlenbergii</i>                                                   |
| <b>AJ005413</b> | <i>Enteromorpha intestinalis</i>      | SY0104        |                                                                                                                                          |
| <b>AY510465</b> | <i>Flechtenia rotunda</i>             | BCP-SEv3-VF49 | USA: Sevilleta LTER, Socorro Co., New Mexico, soil                                                                                       |
| <b>HQ847570</b> | <i>Fortia</i> sp.                     | HA4221-MV2    | USA: Oahu, Hawaii, Laie Falls                                                                                                            |
| <b>AM412753</b> | <i>Gloeotila scopulina</i>            | SAG 335-8     | Sweden: freshwater                                                                                                                       |
| <b>AB360742</b> | <i>Gungnir kasakii</i>                | CCAP 12/8     | UK: Priest Pot, Cumbria, England, freshwater                                                                                             |
| <b>AB360747</b> | <i>Haematococcus lacustris</i>        | NIES-144      | Japan: Sapporo Hokkaido Japan, freshwater lake                                                                                           |
| <b>KM020176</b> | <i>Halochlorococcum dilatatum</i>     | SAG 12.90     | Germany: Helgoland, rock-pool                                                                                                            |
| <b>AY198122</b> | <i>Halochlorococcum moorei</i>        | Wa14-B        | USA: San Juan Island, endophyte in <i>Blidingia</i> cf. <i>minima</i>                                                                    |
| <b>DQ821520</b> | <i>halochlorococcum porphyrae</i>     |               | USA: California, Carmel, endophyte in <i>Porphyra schizophylla</i> , marine                                                              |
| <b>MF034634</b> | <i>Halofilum salinum</i>              | SAG 1.95      | France: schorre de estuary of river Orne at Sallenelles, from piece of wood                                                              |
| <b>MF034615</b> | <i>Halophilum ramosum</i>             | SAG 2050      | UK: Anglesey, Porth Trecastel, in stonecracks of coastal rocks, phycobiont of <i>Wahlenbergiella striatula</i>                           |
| <b>KJ843313</b> | <i>Halotia longispora</i>             | CENA420       | Antarctica: Baranowski glacier biofilm growing on rocks, saline                                                                          |
| <b>KC695854</b> | <i>Halotia wernerae</i>               | CENA 160      | Brazil: mangrove, Cardoso Island, saline soil                                                                                            |
| <b>AM905327</b> | <i>Hassallia byssoidea</i>            | CCALA 823     | Czech Republic: South Moravia, cyanobacterial mat on granitic rock                                                                       |
| <b>KM020117</b> | <i>Heterochlamydomonas inaequalis</i> | SAG 4.75      | USA: Tennessee, forest soil from Wilson Co.                                                                                              |
| <b>LC057289</b> | <i>Ixipapillifera sacculiformis</i>   | SAG 63.72     | Germany: Lüneburger Heide, freshwater pond                                                                                               |

|                 |                                   |                 |                                                                                                                    |
|-----------------|-----------------------------------|-----------------|--------------------------------------------------------------------------------------------------------------------|
| <b>AY493607</b> | <i>Leptolyngbya antarctica</i>    | ANT.L18.1       | Antarctica: Lake Spate/Oskar, Larsemann Hills, microbial mat                                                       |
| <b>HF678483</b> | <i>Leptolyngbya boryana</i>       | UTEX B 488      |                                                                                                                    |
| <b>KX765291</b> | <i>Leptolyngbya ectocarpi</i>     | SABC012402      | Ireland: Ballybunion                                                                                               |
| <b>FM210757</b> | <i>Leptolyngbya laminosa</i>      | ETS-08          | Italy: Padova, Montegrotto Terme, Euganean hot thermal springs, microbial mats                                     |
| <b>FR798934</b> | <i>Leptolyngbya margaretheana</i> | 1T12            | Italy: Firenze, Piazza SS. Annunziata, Tacca's fountain, green biofilm under the water flow on the marble pedestal |
| <b>AY493584</b> | <i>Leptolyngbya</i> sp.           | ANT.L52.1       | Antarctica: Brocknes, Bruehwiler lake (freshwater), microbial mat                                                  |
| <b>GQ859652</b> | <i>Leptolyngbya tenuis</i>        | PMC304.07       | France                                                                                                             |
| <b>Z68696</b>   | <i>Leptosira erumpens</i>         | UTEX 979        | USA: McMahan, Texas, Carrizo Sands                                                                                 |
| <b>Z68695</b>   | <i>Leptosira obovata</i>          | SAG 445-1       | Switzerland: Basel, boggy water at Rosenau                                                                         |
| <b>U70594</b>   | <i>Lobochlamus culleus</i>        | SAG 18.72       | USA: Florida, field near Maxville                                                                                  |
| <b>AJ410456</b> | <i>Lobochlamus segnis</i>         | SAG 52.72       | Czech Republic: Altvater-Gebirge, soil from beech forest near Winkelsdorf                                          |
| <b>AJ410461</b> | <i>Lobochlamys culleus</i>        | SAG 17.73       | Czech Republic: pond in Nordmähren (freshwater)                                                                    |
| <b>KM020046</b> | <i>Lobosphaera incisa</i>         | SAG 2466        |                                                                                                                    |
| <b>AB080301</b> | <i>Marvania coccoides</i>         | CCAP 251/1b     | UK: Cambridge, England, freshwater                                                                                 |
| <b>KM020037</b> | <i>Marvania geminata</i>          | SAG 12.88       | former Czechoslovakia: freshwater                                                                                  |
| <b>FR854374</b> | <i>microglena basinucleata</i>    | SAG 67.72       | Germany: Göttingen, University, pond in Botanical Garden                                                           |
| <b>AY577534</b> | <i>Mojavia pulchra</i>            | JT2-VF2         | USA: Joshua Tree National Park, California, desert soil                                                            |
| <b>KJ939052</b> | <i>Myxacoris californica</i>      | WJT36-NPBG1     | USA: Joshua Tree National Park, Wonderland of Rocks, San Bernardino Co., California, granitic desert soil          |
| <b>KJ939079</b> | <i>Myxacoris chilensis</i>        | ATA2-1-KO14     | Chile: biocrust in Atacama Desert, desert soil                                                                     |
| <b>AB080303</b> | <i>Nannochloris atomus</i>        | CCAP 251/7      | marine                                                                                                             |
| <b>AB080300</b> | <i>Nannochloris bacillaris</i>    |                 |                                                                                                                    |
| <b>AB080302</b> | <i>Nannochloris maculata</i>      | CCAP 251/3      | marine                                                                                                             |
| <b>AY195983</b> | <i>Nannochloris</i> sp.           | JL 4-6          | USA: Arrowood National Wildlife refuge, North Dakota, Jim Lake (freshwater)                                        |
| <b>MK231273</b> | <i>Nannochloris</i> sp.           | KZ-2-2-4        | Ukraine: the Crimea, Leninsky Distinct, Kazantip national reserve, biocrust, clay scree, coast of Azov             |
| <b>MK231273</b> | <i>Nannochloris</i> sp.           | strain KZ-2-2-4 | Ukraine: the Crimea, Leninsky Distinct, Kazantip national reserve, biocrust, clay scree, coast of Azov             |
| <b>JQ920362</b> | <i>Neocystis brevis</i> strain    | CCALA 393       | Switzerland: Unterengadin, soil                                                                                    |



|                 |                                    |                          |                                                                                    |
|-----------------|------------------------------------|--------------------------|------------------------------------------------------------------------------------|
| <b>JQ920367</b> | <i>Neocystis mucosa</i>            | SAG 40.88                | Antarctica: freshwater                                                             |
| <b>AJ416104</b> | <i>Neodangemannia microcystis</i>  | SAG 2022                 | Germany: Helgoland, on old shell in tide pool                                      |
| <b>AB936280</b> | <i>Neospongiococcum proliferum</i> | UTEX 1846                | USA: Memphis, Tennessee, USA. cotton field, Shelby Forest                          |
| <b>EU528669</b> | <i>Nodosilinea bijugata</i>        | str.<br>KOVACIK1986/5a   | Poland: littoral region Lake Piaseczno                                             |
| <b>MH688852</b> | <i>Nodosilinea cf. epilithica</i>  | Ru-6-11                  | Germany: Prora, Ruegen, biocrust, sand dunes, Baltic Sea coast                     |
| <b>MH688851</b> | <i>Nodosilinea cf. epilithica</i>  | Us-2-1                   | Germany: Karlshagen, Usedom, biocrust, Baltic Sea coast                            |
| <b>KF307598</b> | <i>Nodosilinea nodulosa</i>        | UTEX 2910                | China: Hong Kong, South China Sea, ocean plankton                                  |
| <b>MF352005</b> | <i>Nodosilinea radiophila</i>      | TM S2B                   | Iran: thermal springs Ramsar, Mazadaran Province, soil samples, high radioactivity |
| <b>MF348321</b> | <i>Nodosilinea ramsarensis</i>     | KH-S S2.6                | Iran: Ramsar ,Mazandaran Province, soil around the thermal spring (32 °C)          |
| <b>AJ639893</b> | <i>Nodosilinea sp.</i>             | 0BB24S04                 | Italy: Emilia-Romagna, Imola, Bubano Basin                                         |
| <b>HM217061</b> | <i>Nodosilinea sp.</i>             | LEGE 073141              | Portugal: Douro estuary, Douro-Porto edge                                          |
| <b>KM019929</b> | <i>Nodularia harveyana</i>         | SAG 44.85                | UK: Lincolnshire, salt marsh near Gibraltar Pt., brackish water                    |
| <b>AF268022</b> | <i>Nodularia spumigena</i>         | UTEX B2092               | Canada: Osoyoos, British Columbia, Canada, alkaline soil                           |
| <b>HM018687</b> | <i>Oculatella coburnii</i>         | WJT36-NPbg13             | USA: Joshua Tree National Park, California                                         |
| <b>EU528672</b> | <i>Oculatella neakamienensis</i>   | str. Kovacik<br>1990/54  | Greece: Nea Kammeni Island, Volcano                                                |
| <b>AB183610</b> | <i>Oltmannsiellopsis geminata</i>  | MBIC10525                | Endophytic in <i>Cymathere triplicata</i>                                          |
| <b>FN562431</b> | <i>Oltmannsiellopsis viridis</i>   | NIES 360                 | Japan: Onagawa Bay Miyagi                                                          |
| <b>AJ410466</b> | <i>Oogamochlamys gigantea</i>      | SAG 9.84 *               | USA: Texas, Llano Co., soil from Enchanted Rock                                    |
| <b>EU878373</b> | <i>Parietochloris alveolaris</i>   | UTEX 836                 |                                                                                    |
| <b>MF034625</b> | <i>Paulbroadya pertersii</i>       | ULVO-34                  | UK: Oban, Scotland, phycobiont isolated from the lichen <i>Verrucaria mucosa</i>   |
| <b>FR865730</b> | <i>Pectinodesmus pectinatus</i>    | CCAP 276/51              | Finnland: Långkär, Tvärminne, freshwater                                           |
| <b>AY454429</b> | <i>Phaeophila dendroides</i>       | MA2.4a1                  | USA: Quissett Estuary, Woods Hole, MA, in oyster shell                             |
| <b>KU219737</b> | <i>Phormidesmis arctica</i>        | MUM 11-7<br>CCALA 1101 * | Norway: Svalbard, Petunia Bay                                                      |
| <b>AY493581</b> | <i>Phormidesmis priestleyi</i>     | ANT.L66.1                | Antarctica: Larsemann Hills, microbial mat in freshwater lake                      |
| <b>AY493586</b> | <i>Phormidesmis priestleyi</i>     | ANT.LACV5.1              | Antarctica: Long peninsula, Vestfold Hills, saline Ace lake, microbial mat         |
| <b>AY493620</b> | <i>Phormidesmis pristleyi</i>      | ANT.LPR2.5               | Antarctica: Long peninsula, Vestfold Hills, saline Pendant lake, microbial mat     |
| <b>KT731154</b> | <i>Phormidesmis sp.</i>            | CENA335                  | Brazil: Bertioga/SP, leaf of <i>Avicennia schaueriana</i> (mangrove)               |

|                 |                                              |             |                                                                                                |
|-----------------|----------------------------------------------|-------------|------------------------------------------------------------------------------------------------|
| <b>KT731156</b> | <i>Phormidesmis</i> sp.                      | CENA339     | Brazil: Bertioga/SP, leaf of <i>Avicennia schaueriana</i> (mangrove)                           |
| <b>AY493627</b> | <i>Phormidium murrayii</i>                   | ANT.LACV5.2 | Antarctica: Long peninsular, Vestfold Hills, saline Ace lake, microbial mat                    |
| <b>GQ859651</b> | <i>Phormidium</i> sp.                        | PMC301.07   |                                                                                                |
| <b>AY526738</b> | <i>Picochlorum</i> sp.                       | RCC115      | marine                                                                                         |
| <b>AY422076</b> | <i>Picochlorum</i> sp.                       | UTEX 2378   | marine                                                                                         |
| <b>MF034637</b> | <i>Planophila bipyrenoidosa</i>              | ULVO-55     | alpine chalk soils?                                                                            |
| <b>MF034638</b> | <i>Planophila laetevirens</i>                | SAG 2008    | Italy: South Tyrol, Italy, Dolomites, soil                                                     |
| <b>MF034642</b> | <i>Planophila laetevirens</i>                | SAG 465-1   | Switzerland: Basel, garden pool                                                                |
| <b>MF034640</b> | <i>Planophila laetevirens</i>                | ULVO-56     | Ukraine: Cherkassy Oblast, Regional Landscape Park „Trakhtemyriv“, sandstone, chasmoendolithic |
| <b>MF034618</b> | <i>Pseudoclonium commune</i>                 | SAG 2236    | Sweden: Öland, Baltic sea, phycobiont isolated from the lichen <i>Verrucaria maura</i>         |
| <b>MF034610</b> | <i>Pseudoclonium incrustans</i>              | CCAP 415/1  | Austria: phycobiont in lichen <i>Verrucaria aquatilis</i>                                      |
| <b>MF034619</b> | <i>Pseudoclonium<br/>submarinum</i>          | SAG 2237    | UK: West Scotland, phycobiont isolated from the lichen <i>Verrucaria maura</i> (?)             |
| <b>X63520</b>   | <i>Pseudochlorella pringsheimii</i>          | SAG 211-1a  | freshwater                                                                                     |
| <b>LT560358</b> | <i>Pseudochlorella pyrenoidosa</i>           | SAG 18.95   | Italy: South Tyrol, soil from Dolomites                                                        |
| <b>KM116464</b> | <i>Pseudochlorella signiensis</i>            | SAG 7.90    | Antarctica: South Orkney Islands, Signy Island, soil                                           |
| <b>LT560366</b> | <i>Pseudochlorella signiensis</i>            | PS-2        | Ukraine: Island Zmijiny, Black Sea, soil                                                       |
| <b>KM116465</b> | <i>Pseudochlorella signiensis</i>            | SAG 2110    | Göttingen: Nikolausberger Weg 18, from roof tile                                               |
| <b>LT560361</b> | <i>Pseudochlorella signiensis</i>            | SAG 2300    | Africa                                                                                         |
| <b>LT560360</b> | <i>Pseudochlorella signiensis</i>            | SAG 7.90    | Antarctica: South Orkney Islands, Signy Island, soil                                           |
| <b>HQ292734</b> | <i>Pseudomuriella aurantica</i>              | KF43        | Czech Republic: Zbrašovská Cave, cave sediment                                                 |
| <b>KF673365</b> | <i>Pseudomuriella engadinensis</i>           | SAG 221-3   | Switzerland: Unterengadin, soil                                                                |
| <b>AY493587</b> | <i>Pseudophormidium</i> sp.                  | ANT-LPE.3   | Antarctica: Long peninsula, Vestfold Hills, saline Pendant lake, microbial mat                 |
| <b>KF144198</b> | <i>Pseudopleurococcus printzii</i>           | SAG 467-1   | Switzerland: Rosenau/Basel, bog water                                                          |
| <b>MH703749</b> | <i>Pseudostichococcus<br/>monallantoides</i> | Ru-s-4-2    | Germany: Prora, Ruegen, biocrust, sand dunes, Baltic Sea coast                                 |
| <b>MT078185</b> | <i>Pseudostichococcus<br/>monallantoides</i> | SAG 2067    | former Yugoslavia: Dalmatia, Island of Lavsa, soil                                             |
| <b>MT078184</b> | <i>Pseudostichococcus<br/>monallantoides</i> | SAG 379-4   | USA: Massachusetts, aquarium (freshwater)                                                      |

|                 |                                                           |                       |                                                                                                          |
|-----------------|-----------------------------------------------------------|-----------------------|----------------------------------------------------------------------------------------------------------|
| <b>KM020066</b> | <i>Pseudostichococcus monallantoides</i>                  | SAG 380-1             | Germany: from a culture of <i>Enteromorpha compressa</i> (marine)                                        |
| <b>MT078186</b> | <i>Pseudostichococcus monallantoides</i>                  | UTEX 2249             | Laboratory contamination                                                                                 |
| <b>DQ821514</b> | <i>Pseudothrix borealis</i>                               |                       | USA: Amanak Island, Alaska, mid intertidal boulders near the Dutch Harbor airport                        |
| <b>KM20039</b>  | <i>Pumilosphaera</i>                                      |                       |                                                                                                          |
| <b>KM020039</b> | <i>Pumilosphaera acidophila</i>                           | SAG 15.91             | Italy: Napoli, Pozzuoli solfatara at Pisciarelli, freshwater                                             |
| <b>AJ439399</b> | <i>Pumilosphaera protothecoides</i> var. <i>acidicola</i> | strain 124            | Italy: Pisciarelli, Campania, freshwater, pH 2.0                                                         |
| <b>AF388378</b> | <i>Radiococcus polycooccus</i>                            | SAG 217-1c            | UK: Botanical Garden University of. Cambridge, freshwater                                                |
| <b>AJ311640</b> | <i>Raphidonema pyrenoidifera</i>                          | CCAP 470/5            | Antarctica: Chapman Ridge, soil                                                                          |
| <b>Z47997</b>   | <i>Rexenia paucicellulare</i>                             | SAG 463-1             | Switzerland: Basel, Botanical Garden University Basel, Victoria green house, small basin, stagnant water |
| <b>Z47998</b>   | <i>Rexenia sarcinoidea</i>                                | UTEX 1710             | USA: Texas, Bastrop, Bastrop National Park, soil                                                         |
| <b>KM268886</b> | <i>Roholtiella bashkiriorum</i>                           | RU9                   | Russia: Republic of Bashkortostan, Bolsheustikinskoye, meadow land, soil                                 |
| <b>KM268888</b> | <i>Roholtiella edaphica</i>                               | LG-S11                | Russia: Republic of Bashkortostan, forb-grass steppes near Sibay city, soil                              |
| <b>AM087962</b> | <i>Sarcinofilum mucosum</i>                               | SAG 24.93             | USA: Texas, Llano Co., shallow temporary pool in granite rock                                            |
| <b>MF034648</b> | <i>Sarcinofilum mucosum</i>                               | SAG 4.90              | Antarctica: Prinzess Elizabeth Land, Vestfold Hills, freshwater                                          |
| <b>HG514422</b> | <i>Scenedesms rubescens</i>                               | SAG 5.95              | France: near Bordeaux, from a culture of a brown alga                                                    |
| <b>AY510466</b> | <i>Scenedesmus dissociatus</i>                            | UTEX 1537             |                                                                                                          |
| <b>AB055801</b> | <i>Scenedesmus littoralis</i>                             |                       |                                                                                                          |
| <b>X74002</b>   | <i>Scenedesmus rubescens</i>                              | CCAP 232/1            |                                                                                                          |
| <b>JN385286</b> | <i>Schizothrix arenaria</i>                               | HA4233-MV5 clone p5BA | USA: Oahu, Hawaii, Kawai Nui Marsh Nature Preserve, Kailua, mud puddle in a ditch                        |
| <b>MH176132</b> | <i>Scotiellopsis reticulata</i>                           | FACHB-2317            |                                                                                                          |
| <b>AF334700</b> | <i>Scytonema hyalinum</i>                                 | clone 144-3C + 159-3  | USA: Paradise Range, California, soil                                                                    |
| <b>KM020086</b> | <i>Spongiochloris excentrica</i>                          | SAG 280-1             | USA: Tennessee, from soil near Rock Island, Caney Fork river                                             |
| <b>KY086473</b> | <i>Spongiococcum tetrasporum</i>                          | ACSSI 120             | USA: Soil from a cotton field                                                                            |
| <b>KM020135</b> | <i>Spongiococcum tetrasporum</i>                          | SAG 29.95             | USA: Alabama, Green Country, soil from cotton field                                                      |
| <b>FR865740</b> | <i>Sporotetras polydermatica</i>                          | CCAP 31/5             | UK: Windermere, Cumbria, England, freshwater                                                             |

---

|                 |                                      |              |                                                                                                                                       |
|-----------------|--------------------------------------|--------------|---------------------------------------------------------------------------------------------------------------------------------------|
| <b>AF218371</b> | <i>Stenomitos</i>                    |              |                                                                                                                                       |
| <b>MH688849</b> | <i>Stenomitos</i> sp.                | RU-0-2       | Germany: Baabe, Ruegen, biocrust, sand dunes, Baltic Sea coast                                                                        |
| <b>AF218371</b> | <i>Stenomitos tremulus</i>           | UTCC 471     | Canada: Northwest territories                                                                                                         |
| <b>AM412751</b> | <i>Stichococcus chloranthus</i>      | UTEX 315     | Germany: Bernburg/Anhalt                                                                                                              |
| <b>GU017650</b> | <i>Symbiochloris reticulata</i>      | SAG 53.87    | Spain: Tenerife, Roque Chinoté, phycobiont of lichen <i>Lobaria pulmonaria</i> var. <i>meridionalis</i>                               |
| <b>GU017646</b> | <i>Symbiochloris symbiontica</i>     | SAG 2099     | Japan: Geihoku-cho, Hiroshima-Pref. , surface of lichen <i>Graphis</i> sp.                                                            |
| <b>KM020026</b> | <i>Tetracystis aplanospora</i>       | SAG 91.80    | Cuba: soil near Havana                                                                                                                |
| <b>KM020030</b> | <i>Tetracystis diplobionticoidea</i> | SAG 33.95    | USA: AZ, Apache Junction, arid soil                                                                                                   |
| <b>KM020076</b> | <i>Tetracystis dissociata</i>        | SAG 207-1    | Switzerland: soil from Schweiz Nationalpark                                                                                           |
| <b>KM020075</b> | <i>Tetracystis illinoisensis</i>     | SAG 93.80    | USA: IL, Effingham, from petri dish exposed to air from an automobile                                                                 |
| <b>KM020017</b> | <i>Tetracystis pampae</i>            | SAG 22.95    | Italy: South Tyrol, Pitschberg, spoil from Dolomites                                                                                  |
| <b>JN903997</b> | <i>Tetracystis pampae</i>            | SAG 96.80    | USA: TX, Pampa, soil from flower-bed                                                                                                  |
| <b>KM020029</b> | <i>Tetracystis sarcinales</i>        | SAG 19.94    | former Yugoslavia: soil from Isle of Lavsa                                                                                            |
| <b>KM020024</b> | <i>Tetracystis tetraspora</i>        | SAG 98.80    | Cuba: soil from Havana                                                                                                                |
| <b>JN968583</b> | <i>Tetracystis texensis</i>          | SAG 99.80    | USA: Texas, Travis Co., soil from Pilot Knob                                                                                          |
| <b>MH703775</b> | <i>Tetradasmus arenicola</i>         | SAG 2564     | Ukraine: Danube Delta Biosphere Reserve, Kiliya district, Odessa oblast, biocrust, baltic sea coast                                   |
| <b>MH703774</b> | <i>Tetradasmus arenicola</i>         | WD-1-6       | Germany: Warnemünde, biocrust, sand dunes, Baltic sea coast                                                                           |
| <b>AY510468</b> | <i>Tetradasmus bajacalifornicus</i>  | BCP-LG2-VF16 | USA: Sierra San Pedro Martir of Baja California, Mexico, decomposed granite sandy soil                                                |
| <b>HQ246450</b> | <i>Tetradasmus bajacalifornicus</i>  | ZA1-7        | South Africa: 6 K N of Klawer along N7                                                                                                |
| <b>AY510474</b> | <i>Tetradasmus deserticola</i>       | BCP EM2-VF3  | USA: Sierra San Pedro Martir of Baja California, Mexico, decomposed granite sandy soil                                                |
| <b>AY510471</b> | <i>Tetradasmus deserticola</i>       | BCP-SNI-2    | USA: San Nicolas Island, California, soil                                                                                             |
| <b>HG514429</b> | <i>Tetradasmus distendus</i>         | SAG 2003     | Germany: Berlin, Lake Havel (freshwater)                                                                                              |
| <b>FR865722</b> | <i>Tetradasmus incrassatulus</i>     | CCAP 276/43  | Peru: Lake Yanayacu (freshwater)                                                                                                      |
| <b>FR865731</b> | <i>Tetradasmus obliquus</i>          | CCAP 276/52  | New Zealand                                                                                                                           |
| <b>MG022741</b> | <i>Tetradasmus obliquus</i>          | 276/3C       | Germany: Marburg, freshwater                                                                                                          |
| <b>FR865726</b> | <i>Tetradasmus obliquus</i>          | CCAP 276/49  | Finnland: Lake Tuomiojaervi, Jyvaeskylae                                                                                              |
| <b>HG514426</b> | <i>Tetradasmus raciborskii</i>       | CCAP 276/35  | Germany: Lake Steinhuder Meer (freshwater)                                                                                            |
| <b>HG514430</b> | <i>Tetradasmus wisconsinensis</i>    | SAG 22.81    | Peru: Dpto. Ancash, Laguna Pataccocha                                                                                                 |
| <b>DQ275461</b> | <i>Tetrastichococcus jenerensis</i>  | SAG 2138     | Malaysia: Kelantan, Kampong Kuala Jenera, surface soil crust on unidentified tree base in a secondary lowland rainforest, 400m a.s.l. |

---

|                 |                                                |                                       |                                                                                                                                       |
|-----------------|------------------------------------------------|---------------------------------------|---------------------------------------------------------------------------------------------------------------------------------------|
| <b>JQ083654</b> | <i>Tolypothrix campylonemoides</i>             | FI5-MK38 clone<br>p10D                | USA: Fort Irwin NTC, San Bernadino Co, California, sand                                                                               |
| <b>GQ287651</b> | <i>Tolypothrix distorta</i>                    | SAG 93.79                             | Spain: Mallorca, from a south-exposed wall of porous stones                                                                           |
| <b>JQ083651</b> | <i>Tolypothrix tenuis</i> f. <i>terrestris</i> | UFS-BI-NPMV-<br>1A2-F06 clone<br>p13E | USA: Utah, foothills of the Onaquee Mountains, arid soil after a burn                                                                 |
| <b>EU123942</b> | <i>Trebouxia aggregata</i>                     | SAG 219-1d                            | phycobiont of lichen <i>Xanthoria parientina</i>                                                                                      |
| <b>Z21553</b>   | <i>Trebouxia asymmetrica</i>                   | SAG 48.88                             | Spain: Catalunya, Sa. de Roses, roadside at the street to El Port de la Selva, phycobiont of lichen<br><i>Diploschistes albescens</i> |
| <b>EF429297</b> | <i>Trichocoleus badius</i>                     | CRS-1                                 | USA                                                                                                                                   |
| <b>KF307604</b> | <i>Trichocoleus desertorum</i>                 | ATA4-8-CV2<br>clone ACE               | Chile: biocrust in Atacama Desert, desert soil                                                                                        |
| <b>MT078171</b> | <i>Tritostichococcus solitus</i>               | SAG 2406                              | Germany: tufa-forming karstwater stream "Deinschwanger Bach", western margin of the Franconian Alb, biofilm on rock surface           |
| <b>MF034653</b> | <i>Ulothrix zonata</i>                         | SAG 38.86                             |                                                                                                                                       |
| <b>AY278217</b> | <i>Ulothrix zonata</i>                         | UTEX 745                              | USA: Lake Michigan (freshwater)                                                                                                       |
| <b>AY303586</b> | <i>Ulva californica</i>                        | FH-3.2                                | USA: San Juan Island, Washington, drift, False Bay                                                                                    |
| <b>HQ219374</b> | uncultured Chlorophyta<br>clone                | AY2009A8                              | France: Lake Pavin or Lake Aydat (freshwater)                                                                                         |
| <b>AB058345</b> | unicellular ulvophyte                          | MBIC10446                             |                                                                                                                                       |
| <b>AY476821</b> | <i>Urospora neglecta</i>                       | Seward 8                              | USA: Seward 8, Alaska, marine                                                                                                         |
| <b>AY653741</b> | <i>Urospora neglecta</i>                       | Un155                                 | USA: Seppings I., Barkley, South Dakota                                                                                               |
| <b>AY476809</b> | <i>Urospora pencilliformis</i>                 | Boiler Bay                            | USA: Oregon, Boiler Bay                                                                                                               |
| <b>AY476808</b> | <i>Urospora pencilliformis</i>                 | strain Point No<br>Point              | Canada: Point No Point, Vancouver, British Columbia                                                                                   |
| <b>AY476819</b> | <i>Urospora wormskioldii</i>                   | Park 1                                | Canada: Park 1, Halifax, Nova Scotia                                                                                                  |
| <b>AY476816</b> | <i>Urospora wormskioldii</i>                   | strain Louisbourg<br>5                | Canada: Louisbourg 5, Nova Scotia                                                                                                     |
| <b>FM958481</b> | <i>Viridiella fridericana</i>                  | SAG 10.92                             | Italy: Campania, at Mefite di Ansanto, soil from sulphurous vents                                                                     |
| <b>AJ439401</b> | <i>Viridiella fridericana</i>                  | strain 237                            | Italy: Mefite di Ansanto, Campania, freshwater, pH 2.0                                                                                |
| <b>MH499915</b> | <i>Watanabea acidophila</i>                    | ISBAL-1011                            | Czech Republic: Sokolov mining district (Chodov), acidic soil-coal clays                                                              |

---

|                 |                             |             |                                                                                                                |
|-----------------|-----------------------------|-------------|----------------------------------------------------------------------------------------------------------------|
| <b>MH499916</b> | <i>Watanabea acidophila</i> | ISBAL-1112  | Czech Republic: Sokolov mining district (Chodov), dump after coal mining, acidic soil- volcanic ashes (pH 3.5) |
| <b>MH499914</b> | <i>Watanabea alpicola</i>   | FG2-10/3    | Germany: forest soil                                                                                           |
| <b>MH499913</b> | <i>Watanabea alpicola</i>   | SAG 2580    | Switzerland: Unterengadin, soil                                                                                |
| <b>MH499912</b> | <i>Watanabea patagonica</i> | CCAP 6091/1 | Argentina: Patagonia, Acid Lake Caviahue                                                                       |
| <b>FM958480</b> | <i>Watanabea reniformis</i> | SAG 211-9b  | UK: West Humble, Dorking, garden basin                                                                         |

---
